# Supplementary material for: Proposing an Ecosystem of Digital Health Solutions for Teens With Chronic Conditions Transitioning to Self-Management and Independence: Exploratory Qualitative Study
Source: PubMed Central journal article supplement (PMC6231785; doi:10.2196/10285), 2018-09-06

# Multimedia Appendix 1. Tools and materials for the activities

## Assignment

for the Child

# Hi!

Thank you for agreeing to participate in this interview! We are seeking to understand the experiences you have and the challenges you face managing your health condition. Sharing your thoughts will help us develop technology to help people follow their treatment plan. The following activities will help you better prepare and get warmed-up for your upcoming interview.

Please print out and complete this workbook. Once you've completed it, scan it (or take a photo of it) and email it back to penny@thestratogroup.com by Monday Feb. 27. You will need to bring it to your interview session.

If you have any questions about completing this homework please call us at Stratos (614) 300-7989.

## About Me

Name \_\_\_\_\_ Age \_\_\_\_\_

It's been \_\_\_\_\_ years since I first learned I had a health condition

### My Personality

In the following table mark an "X" between the two ends of each scale that best describes your personality.

Left Example   Right Example

I'm Dependent           I'm Independent

I

E

I'm Reactive           I'm Proactive

L

H

### MY WORLD

Please briefly write a response to each of the prompts in the circles to the right:

### THE PEOPLE WHO CARE FOR ME

Please write or draw the people who care for you (including family, friends, medical professionals, etc.) the ones who are most involved write in the inner circles and the ones that are the least involved write in the outer circle.

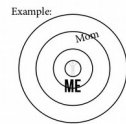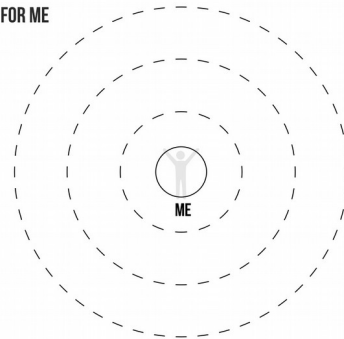

### A TYPICAL DAY IN MY LIFE AS I MANAGE MY HEALTH CONDITION

What do you do and what are the challenges that you and your parents face? Walk us through how you get ready for the day and for bed.

**WAKE UP**

WHAT I DO DURING MY **MORNING ROUTINE** | THINGS ABOUT LIVING WITH MY CONDITION THAT CHALLENGE ME AND MY PARENTS **IN THE MORNING**

WHAT I DO DURING MY **DAYTIME ROUTINES** | THINGS ABOUT LIVING WITH MY CONDITION THAT CHALLENGE ME AND MY PARENTS **DURING THE DAY**

WHAT I DO DURING MY **NIGHT ROUTINE** | THINGS ABOUT LIVING WITH MY CONDITION THAT CHALLENGE ME AND MY PARENTS **IN THE MORNING**

**7:11** **BED TIME**

### DRAW THE FUTURE

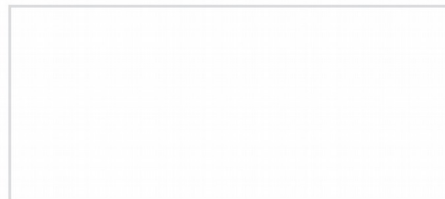

# Activity 1

## Canvas, materials and a sample of finalized activity

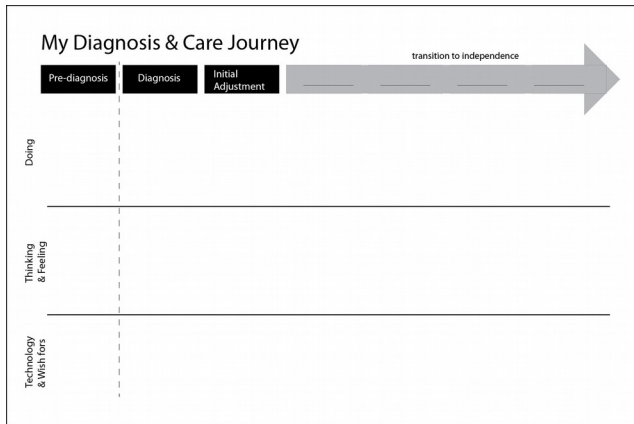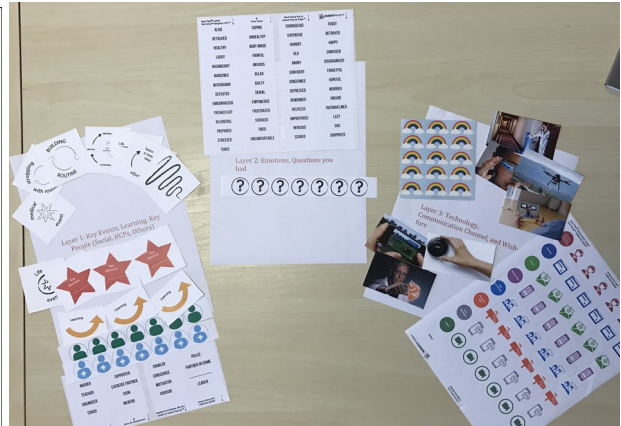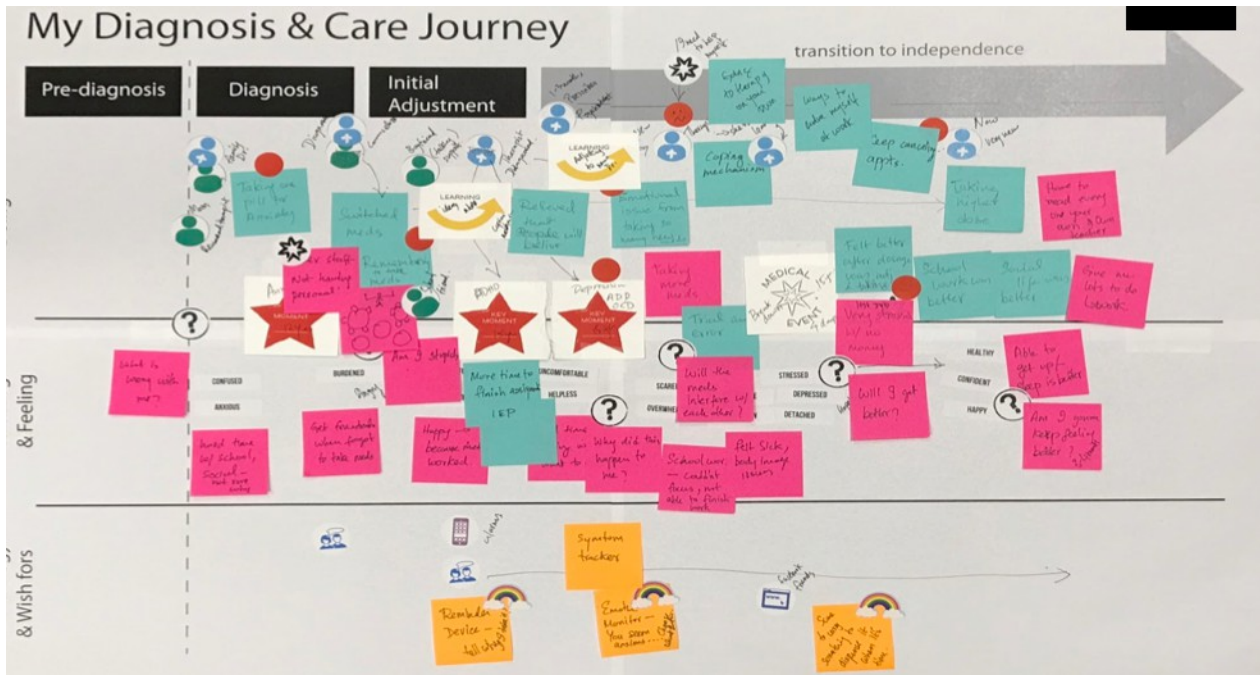

## Activity 2

### Canvas, materials and a sample of finalized activity

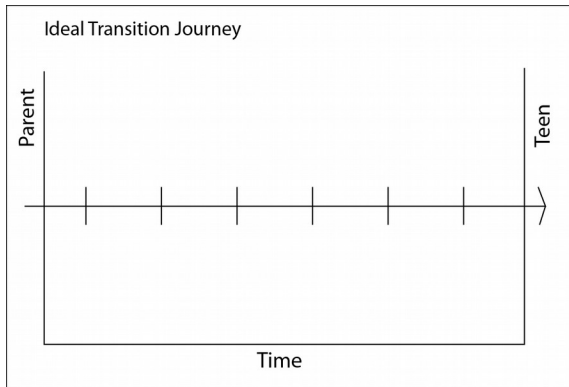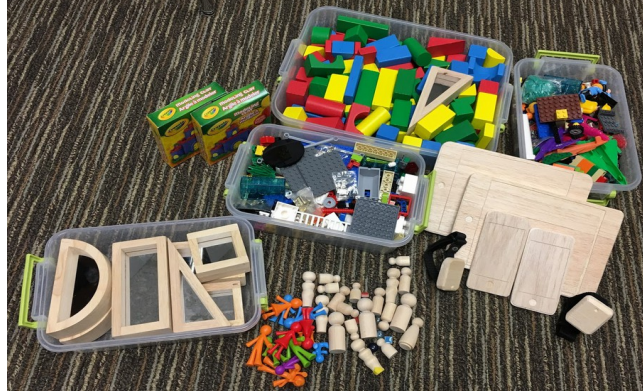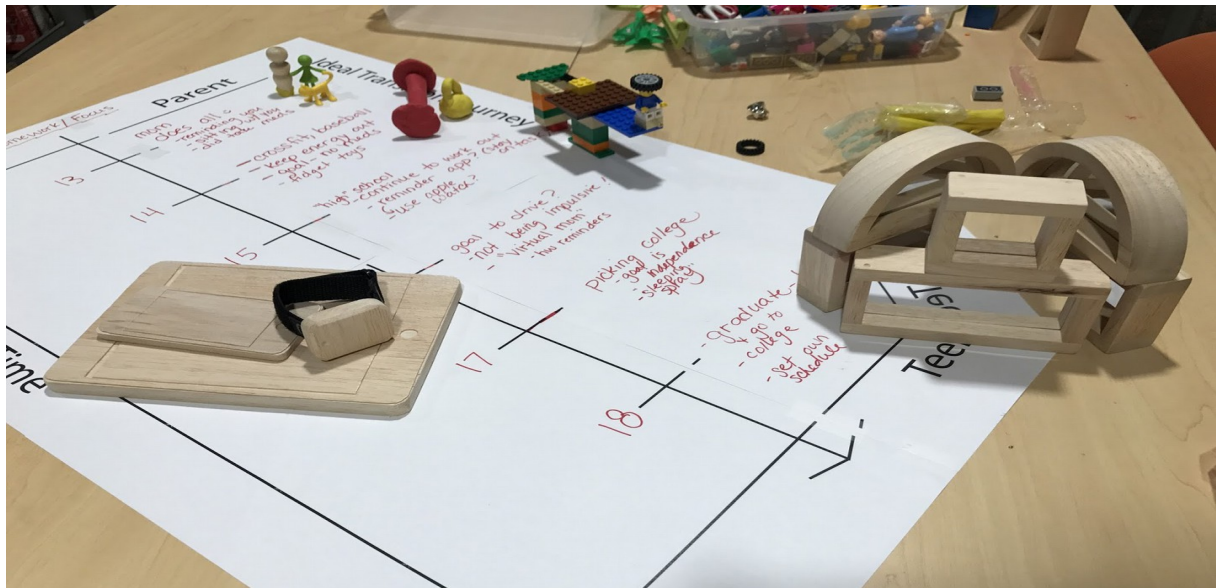

Supplement: jmir_v20i9e10285_app1.pdf [file jmir_v20i9e10285_app1.pdf]
